# Supplementary material for: Selenium is a modulator of circadian clock that protects mice from the toxicity of a chemotherapeutic drug via upregulation of the core clock protein, BMAL1
Source: PubMed Central journal article supplement (PMC3282084; doi:10.18632/oncotarget.411), 2011-12-31
Supplement: oncotarget-02-1279-s001.pdf [file oncotarget-02-1279-s001.pdf]

**Fig. S1** The concentration of selenium in the diet of mice does not affect their circadian pattern of locomotor activity. Representative records of locomotor activity are shown for animals maintained on regular, selenium-free or selenium-enriched diets. Activity records are double plotted so that 48 hrs are represented horizontally. The black and white bar at the top represents the light schedule for the first 2 weeks of the experiment. Mice were synchronized to a light:dark cycle (LD 12:12) for 2 weeks before placement in constant darkness (DD) for the remainder of the experiment (days 14 through 35).

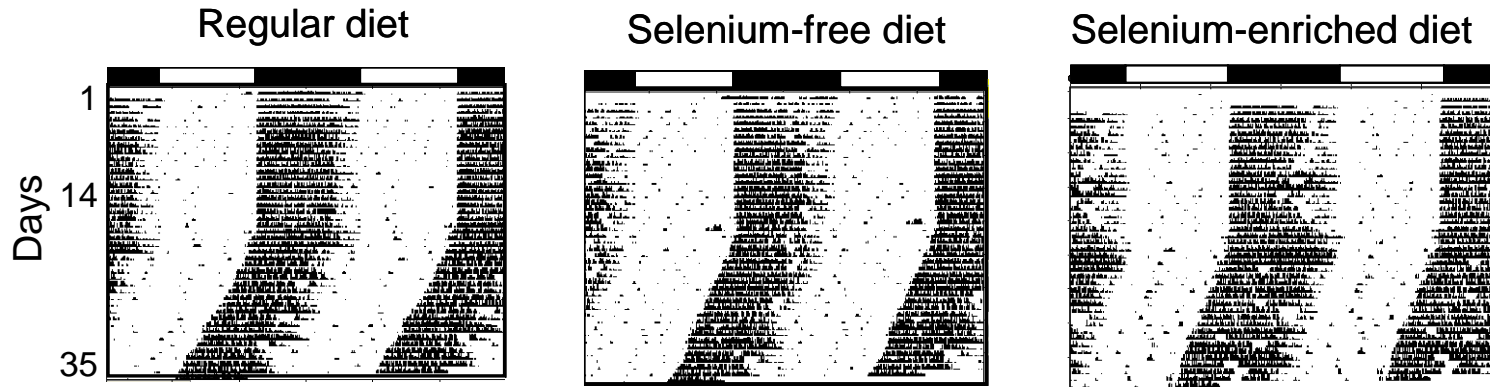

Table S1. Inhibitors of CLOCK/BMAL1-mediated activation of *Per1* promoter

| Compound name                          | Function                                |
|----------------------------------------|-----------------------------------------|
| Beclomethasone                         | Glucocorticoid                          |
| Budesonide                             | Glucocorticoid                          |
| Betamethasone                          | Glucocorticoid                          |
| Corticosterone                         | Glucocorticoid                          |
| Cyclosporin A                          | Calcineurin phosphatase inhibitor       |
| SD-169                                 | P38 MAPK inhibitor                      |
| Hydrocortisone                         | Glucocorticoid                          |
| Hydrocortisone 21-hemisuccinate sodium | Glucocorticoid                          |
| Ivermectin                             | Modulator of acetylcholine receptor     |
| Mifepristone                           | Progesterone receptor antagonis         |
| Cortexolone                            | Glucocorticoid                          |
| Rottlerin                              | PKC and CaM kinase III inhibitor        |
| Triamcinolone                          | Glucocorticoid                          |
| Tyrphostin A9                          | PDGF tyrosine kinase receptor inhibitor |

Table S2. Activators of CLOCK/BMAL1-mediated activation of *Per1* promoter

| Compound name                           | Function                                            |
|-----------------------------------------|-----------------------------------------------------|
| Cantharidine                            | Protein phosphatase 2A inhibitor                    |
| Colchicine                              | Inhibitor of tubulin polymerization                 |
| Cantharidic Acid                        | Protein phosphatase 1 (PP1) and 2A (PP2A) inhibitor |
| Forskolin                               | Activator of adenylate cyclase                      |
| Kenpaullone                             | Inhibitor of CDK                                    |
| LY-294,002 hydrochloride                | PI3K inhibitor                                      |
| Kynurenic acid                          | Glutamate antagonist                                |
| Nocodazole                              | Disrupts microtubules by binding to beta-tubulin    |
| 2-methoxyestradiol                      | Estrogen                                            |
| Norcantharidine                         | PP2A inhibitor                                      |
| Se-(methyl)selenocysteine hydrochloride | Potent chemopreventive agent                        |
| Podophyllotoxin                         | Inhibitor of microtubule assembly                   |
| Quercetin                               | ATPase, PDE and PI3K inhibitor                      |
| Taxol                                   | Inhibitor of tubulin disassembly                    |
| Vincristine sulfate                     | Inhibitor of microtubule assembly                   |
| Vinblastine sulfate salt                | Inhibitor of microtubule assembly                   |
| (±)-Verapamil hydrochloride             | Modulator of L-type Ca <sup>2+</sup> Channel        |

Table S3. Parameters of circadian locomotor activity of animals on different selenium diet

|                        | alpha time (hr) | rho time (hr) | tau (hr)   | Total counts in DD (Rev/day) | Total counts in LD (Rev/day) |
|------------------------|-----------------|---------------|------------|------------------------------|------------------------------|
| Regular diet           | 9.55±0.55       | 14.10±0.43    | 23.62±0.16 | 39469±6012                   | 36165±5159                   |
| Selenium-free diet     | 9.32±0.86       | 14.25±0.86    | 23.57±0.11 | 33459±6866                   | 31734±6383                   |
| Selenium-enriched diet | 10.08±1.09      | 13.50±1.06    | 23.58±0.11 | 37557±5628                   | 30967±5004                   |
